# Supplementary material
Source: PubMed Central journal article supplement (PMC3318571)
Supplement: supp_50.4.1427_JCM-JCM06003-11-s01.pdf [file supp_50.4.1427_JCM-JCM06003-11-s01.pdf]

## **SUPPLEMENTAL MATERIAL**

### **Preliminary study in which cut-offs for the correlation study between sediMAX and bacterial urine cultures were established.**

In brief, the preliminary study consisted in a correlation study between 106 urine sediment results and their corresponding bacterial counts. Urine samples were treated as indicated in the text of the article and a sample was considered as being positive for screening if the particle count for bacteria exceeded 25 elements/HPF (110 elements/ $\mu\text{L}$ ). Sensitivity was calculated to be 68.4% and FNR as 31.6% according to Clinical and Laboratory Standards Institute (CLSI) EP 12-A (9). Evaluation of the bacterial counts found in those urine sediments with a false negative result induced us to lower the count to 10 elements/HPF (44.4 elements/ $\mu\text{L}$ ). Indeed, at this value, these same sediments would have been considered as true positives, thereby reducing the FNR to 9.7%.

**Table 3. Performance of sediMAX in comparison to other automated analyzers**

|                                        | <b>sediMAX<br/>(1)</b> | <b>sediMAX<br/>(2)</b> | <b>UF 1000i<br/>(Perietti et al)</b> | <b>UF 100<br/>(Gessoni et al)</b> | <b>iQ 200<br/>(Accordini et al)</b> |
|----------------------------------------|------------------------|------------------------|--------------------------------------|-----------------------------------|-------------------------------------|
| <b>Sensitivity<br/>(%)</b>             | <b>98.3</b>            | <b>98.3</b>            | <b>98.2</b>                          | <b>95.0</b>                       | <b>86.2</b>                         |
| <b>Specificity<br/>(%)</b>             | <b>59.0</b>            | <b>75.2</b>            | <b>62.1</b>                          | <b>95.0</b>                       | <b>65.1</b>                         |
| <b>NPV (%)</b>                         | <b>99.4</b>            | <b>99.4</b>            | <b>98.7</b>                          | <b>98.0</b>                       | <b>91.6</b>                         |
| <b>PPV (%)</b>                         | <b>35.0</b>            | <b>47.0</b>            | <b>53.7</b>                          | <b>86.0</b>                       | <b>51.6</b>                         |
| <b>False<br/>Negative<br/>(%)</b>      | <b>0.3</b>             | <b>0.3</b>             | <b>0.6</b>                           | <b>1.2</b>                        | <b>4.2</b>                          |
| <b>False<br/>Negative<br/>Rate (%)</b> | <b>1.7</b>             | <b>1.7</b>             | <b>1.8</b>                           | <b>5.0</b>                        | <b>13.8</b>                         |
| <b>Diagnostic<br/>Accuracy<br/>(%)</b> | <b>66.1</b>            | <b>78.4</b>            | <b>73.3</b>                          | <b>95.0</b>                       | <b>71.4</b>                         |

(1) Before reclassification of 126 samples with debris

(2) After reclassification of 126 samples with debris
